# Supplementary material for: Production of Cyclic Anhydride-Modified Starches
Source: MDPI journal article supplement (doi:10.3390/polym13091504), 2021-05-07
Supplement: s1 [file s1]

## Article

# Production of Cyclic Anhydride-Modified Starches

Ryan C. Amos <sup>1</sup>, Julien Mesnager <sup>2</sup>, Michael Kuska <sup>2</sup> and Mario Gauthier <sup>1,\*</sup>

<sup>1</sup> Department of Chemistry, Institute for Polymer Research, University of Waterloo, 200 University Avenue West, Waterloo, Ontario N2L 3G1, Canada; r2amos@uwaterloo.ca

<sup>2</sup> EcoSynthetix Inc., 3365 Mainway, Burlington, ON L7M 1A6, Canada

\* Correspondence: gauthier@uwaterloo.ca; Tel.: +1-519-888-4567 (ext. 35205)

## Supplementary Materials

**Citation:** Amos, R.C.; Mesnager, J.; Kuska, M.; Gauthier, M. Production of Cyclic Anhydride-Modified Starches. *Polymers* **2021**, *13*, 1504. <https://doi.org/10.3390/polym13091504>

Academic Editor: Łukasz Klapiszewski

Received: 12 April 2021

Accepted: 4 May 2021

Published: date

**Publisher's Note:** MDPI stays neutral with regard to jurisdictional claims in published maps and institutional affiliations.

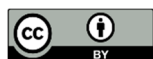

**Copyright:** © 2021 by the authors. Licensee MDPI, Basel, Switzerland. This article is an open access article distributed under the terms and conditions of the Creative Commons Attribution (CC BY) license (<http://creativecommons.org/licenses/by/4.0/>).

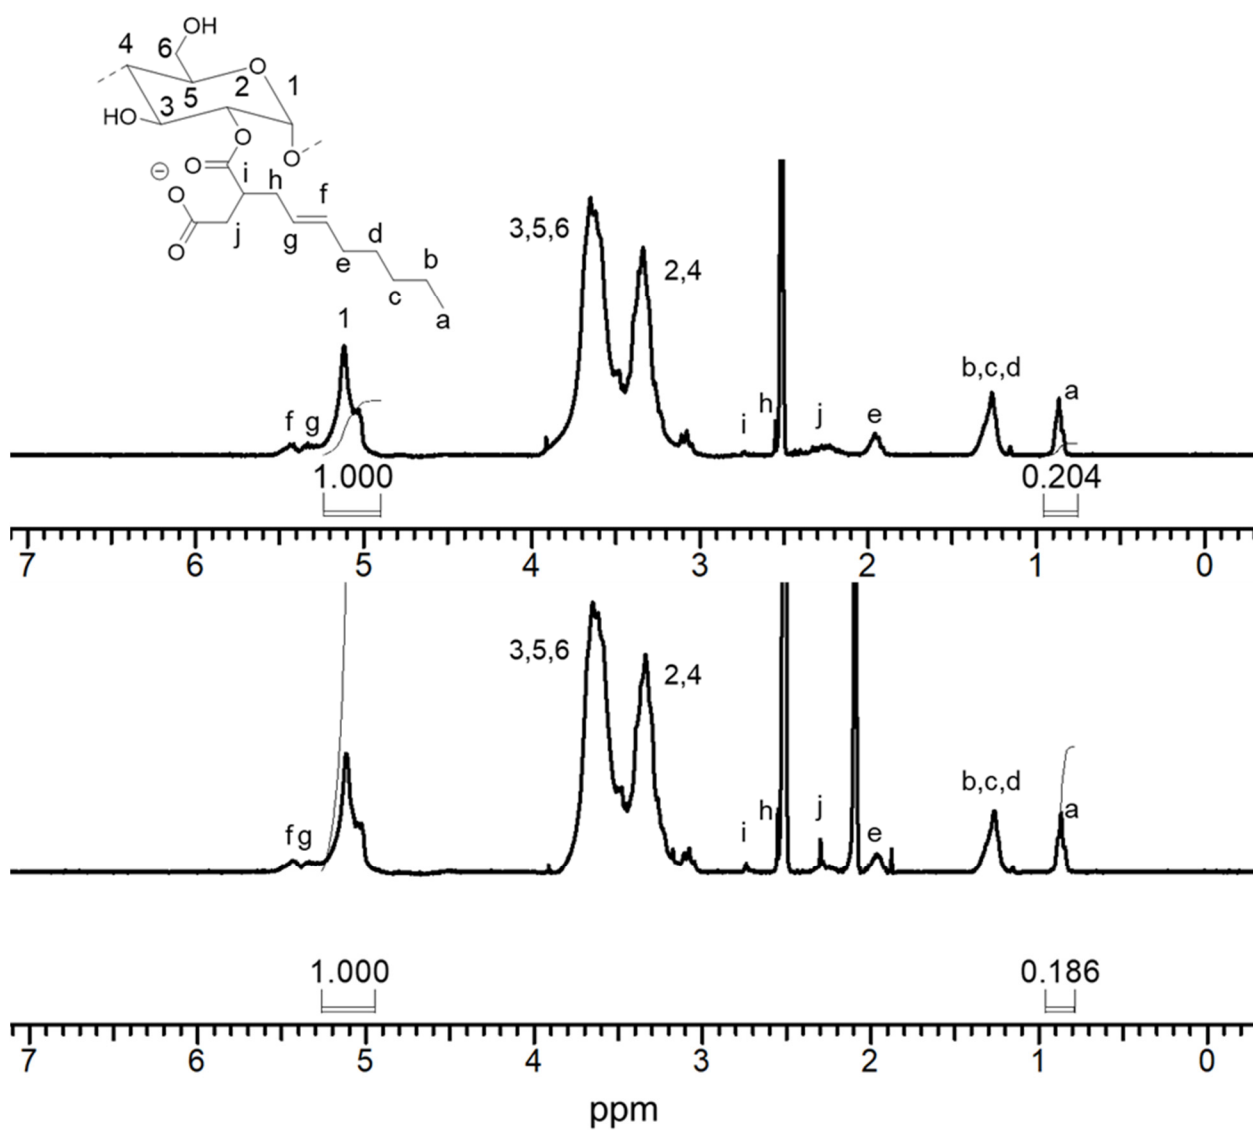

**Figure 1.**  $^1\text{H}$  NMR spectra for OSA-modified starch in  $\text{DMSO}-d_6$  (top) prior to purification and (bottom) after purification with acetone.

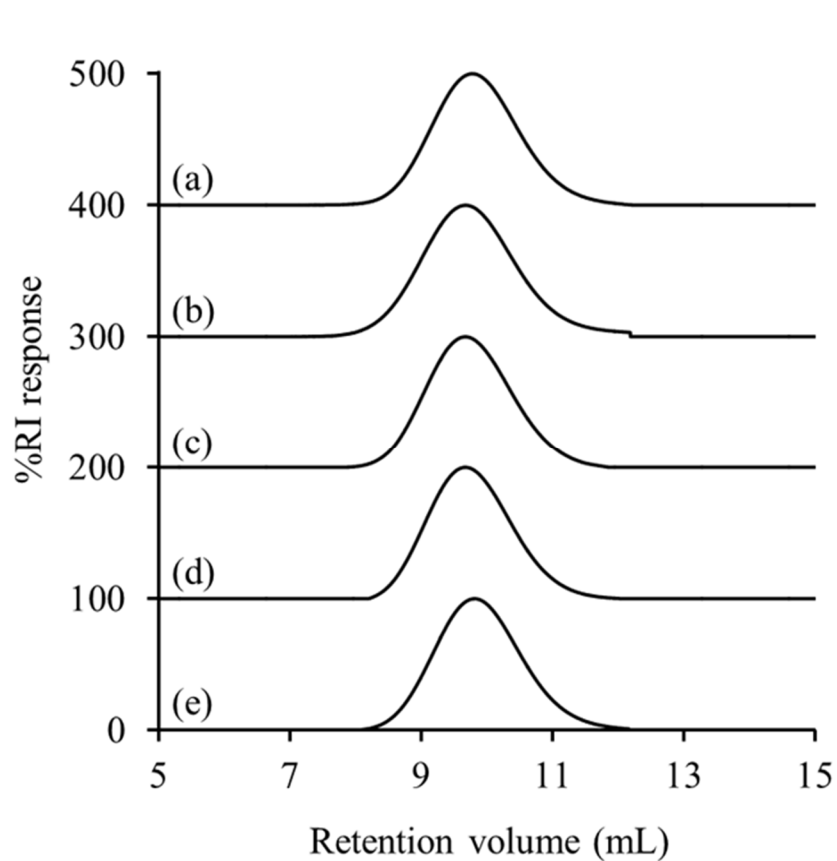

**Figure 2.** GPC elution curves for the baseline-subtracted normalized RI detector response for (a) unmodified gelatinized starch, gelatinized starch modified with (b) 5 wt% OSA, (c) 10 wt% OSA, (d) 5 wt% DDSA, and (e) 10 wt% DDSA in dispersed phase reactions. The position of each curve was shifted on the vertical axis for clarity.

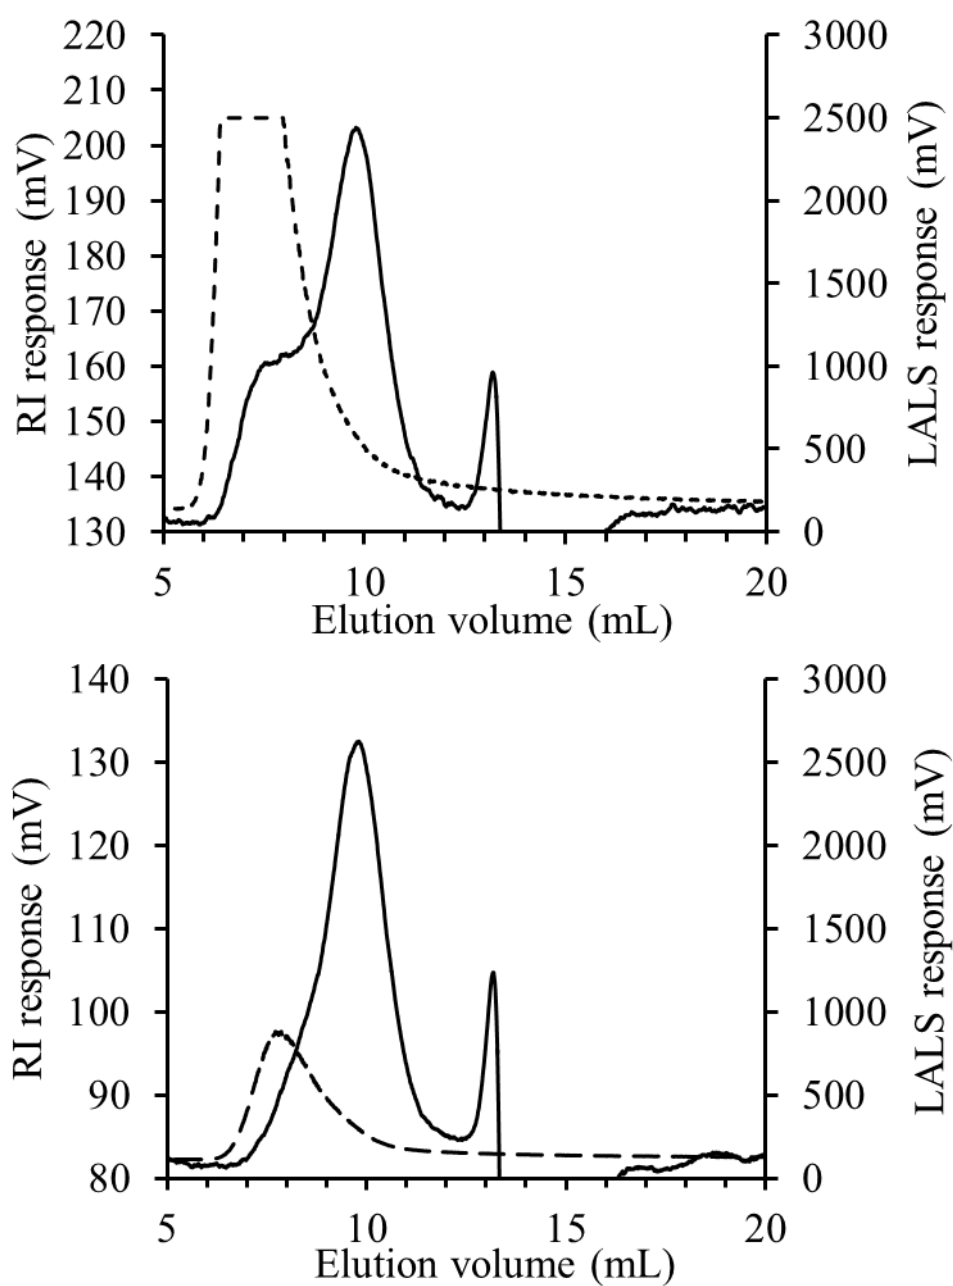

**Figure 3.** GPC elution curves with RI ( — ) and LALS ( - - ) detector responses for starch modified in a melt mixer under identical conditions, leading to LALS detector saturation (top; 5 wt% DDSA without base) and no saturation (bottom; 10 wt% OSA with base).

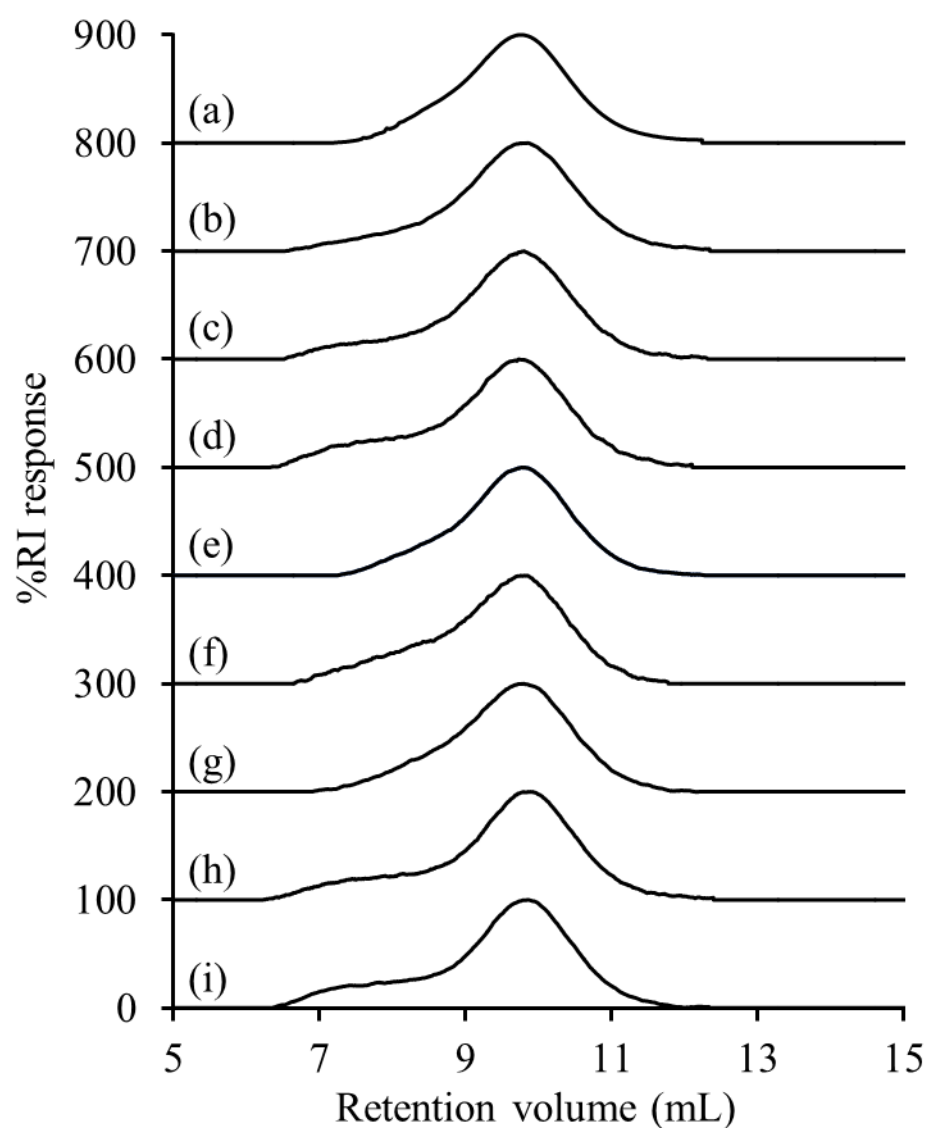

**Figure 4.** GPC elution curves with baseline-subtracted normalized RI detector response for starch modified in the melt mixer: (a) unmodified starch, and starch modified with (b) 5 wt% OSA, (c) 10 wt% OSA, (d) 5 wt% DDSA, and (e) 10 wt% DDSA without base; starch modified with (f) 5 wt% OSA, (g) 10 wt% OSA, (h) 5 wt% DDSA, and (i) 10 wt% DDSA with base. The position of each curve was shifted on the vertical axis for clarity.
